# Supplementary material for: Two S = 1/2 one-dimensional barium copper phosphates showing antiferromagnetic and ferromagnetic intrachain interactions
Source: Royal Society of Chemistry journal article supplement (doi:10.1039/c5dt03725e), 2016-01-01
Supplement: c5dt03725e3.pdf [file c5dt03725e3.pdf]

## Supporting Information

### Two $S = 1/2$ One-Dimensional Barium Copper Phosphates Showing Antiferromagnetic and Ferromagnetic Intrachain Interactions

Ming Yang,<sup>a</sup> Meiyang Cui,<sup>a,b</sup> Suyun Zhang,<sup>a</sup> Hongping Xiang,<sup>\*a</sup> Wenbin Guo<sup>a</sup> and Zhangzhen He<sup>\*a</sup>

<sup>a</sup>State Key Laboratory of Structural Chemistry, Fujian Institute of Research on the Structure of Matter,  
Chinese Academy of Sciences, Fuzhou, 350002, P. R. China.

E-mail: xianghp@fjirsm.ac.cn, hcz1988@hotmail.com or hezz@fjirsm.ac.cn.

Fax: +86-591-63173255; Tel: +86-591-63173254, +86-591-63173255.

<sup>b</sup>University of Chinese Academy of Sciences, Beijing, 100049, P. R. China.

**Table S1** Selected bond lengths [ $\text{\AA}$ ] and angles [ $^\circ$ ] for **1** and **2**.

| BaCu <sub>2</sub> (PO <sub>4</sub> ) <sub>2</sub> (H <sub>2</sub> O) |            |                       |            |                      |           |
|----------------------------------------------------------------------|------------|-----------------------|------------|----------------------|-----------|
| Ba1—O1                                                               | 2.727 (2)  | Ba1—O3                | 3.132 (3)  | Ba1—O3 <sup>v</sup>  | 2.899 (2) |
| Ba1—O7 <sup>i</sup>                                                  | 2.754 (2)  | Ba1—O6 <sup>iii</sup> | 2.785 (2)  | Ba1—O5 <sup>ii</sup> | 3.007 (2) |
| Ba1—O8 <sup>ii</sup>                                                 | 2.770 (2)  | Ba1—O2 <sup>iv</sup>  | 2.850 (2)  | Ba1—O4 <sup>v</sup>  | 3.109 (3) |
| Ba1—O8 <sup>i</sup>                                                  | 3.147 (2)  | Ba1—O8 <sup>iii</sup> | 3.214 (2)  |                      |           |
| Cu1—O1                                                               | 1.912 (2)  | Cu1—O6 <sup>v</sup>   | 1.912 (2)  | Cu1—O4 <sup>v</sup>  | 1.998 (2) |
| Cu1—O5                                                               | 2.014 (2)  | Cu1—O9                | 2.490 (2)  |                      |           |
| Cu2—O2                                                               | 1.987 (2)  | Cu2—O4 <sup>vi</sup>  | 2.005 (2)  | Cu2—O9               | 2.259 (2) |
| Cu2—O7 <sup>vi</sup>                                                 | 1.922 (2)  | Cu2—O5                | 1.961 (2)  |                      |           |
| P1—O1                                                                | 1.546 (2)  | P1—O2                 | 1.528 (2)  | P1—O3                | 1.505 (2) |
| P1—O4                                                                | 1.584 (2)  |                       |            |                      |           |
| P2—O5                                                                | 1.578 (2)  | P2—O6                 | 1.541 (2)  | P2—O7                | 1.541 (2) |
| P2—O8                                                                | 1.492 (2)  |                       |            |                      |           |
| Cu1—Cu2                                                              | 3.192(4)   | Cu1—Cu2 <sup>ii</sup> | 3.259(3)   |                      |           |
| Cu1 <sup>vii</sup> —O4—Cu2 <sup>iii</sup>                            | 109.04 (7) | Cu2—O5—Cu1            | 106.82 (4) | Cu2—O9—Cu1           | 84.32 (4) |

Symmetry codes: (i) 1/2-x, 1-y, 1/2+z; (ii) 1-x, 1/2+y, 1/2-z; (iii) -x, 1/2+y, 1/2-z; (iv) 1/2+x, 1/2-y, 1-z; (v) 1+x, y, z; (vi) -x, -1/2+y, 1/2-z; (vii) -1+x, y, z.

| Ba <sub>2</sub> Cu(HPO <sub>4</sub> )(PO <sub>4</sub> )(OH) |           |                            |           |                       |           |
|-------------------------------------------------------------|-----------|----------------------------|-----------|-----------------------|-----------|
| Ba1—O1                                                      | 2.878 (4) | Ba1—O2                     | 3.155 (3) | Ba1—O2 <sup>v</sup>   | 3.155 (3) |
| Ba1—O1 <sup>i</sup>                                         | 2.878 (4) | Ba1—O3 <sup>ii</sup>       | 2.755 (6) | Ba1—O4                | 2.735 (4) |
| Ba1—O4 <sup>i</sup>                                         | 2.735 (4) | Ba1—O4 <sup>iii</sup>      | 2.926 (4) | Ba1—O4 <sup>iv</sup>  | 2.926 (4) |
| Ba1—O7                                                      | 2.718 (5) |                            |           |                       |           |
| Ba2—O1                                                      | 2.893 (4) | Ba2—O1 <sup>i</sup>        | 2.893 (4) | Ba2—O2 <sup>ii</sup>  | 2.588 (6) |
| Ba2—O3                                                      | 3.210 (3) | Ba2—O3 <sup>v</sup>        | 3.210 (3) | Ba2—O4 <sup>vii</sup> | 2.825 (4) |
| Ba2—O4 <sup>viii</sup>                                      | 2.825 (4) | Ba2—O5 <sup>vi</sup>       | 2.755 (5) | Ba2—O6 <sup>vi</sup>  | 3.082 (6) |
| Ba2—O6 <sup>viii</sup>                                      | 3.202 (3) | Ba2—O6 <sup>ix</sup>       | 3.202 (3) |                       |           |
| Cu1—O1                                                      | 2.004 (4) | Cu1—O1 <sup>vi</sup>       | 2.004 (4) | Cu1—O7                | 1.915 (3) |
| Cu1—O7 <sup>vi</sup>                                        | 1.915 (3) | Cu1—O5                     | 2.486 (2) | Cu1—O5 <sup>x</sup>   | 2.486 (2) |
| P1—O1                                                       | 1.550 (4) | P1—O1 <sup>xi</sup>        | 1.550 (4) | P1—O2                 | 1.531 (6) |
| P1—O3                                                       | 1.535 (6) |                            |           |                       |           |
| P2—O4                                                       | 1.528 (4) | P2—O4 <sup>xi</sup>        | 1.528 (4) | P2—O5                 | 1.513 (5) |
| P2—O6                                                       | 1.636 (6) | Cu1—Cu1 <sup>x</sup>       | 2.934 (6) |                       |           |
| Cu1 <sup>x</sup> —O7—Cu1                                    | 100.0 (2) | Cu1 <sup>xii</sup> —O5—Cu1 | 72.35 (2) |                       |           |

Symmetry codes: (i) x, 3/2-y, z; (ii) 1-x, 1-y, -z; (iii) -x, 1-y, -z; (iv) -x, 1/2+y, -z; (v) x, 1+y, z; (vi) 1-x, 1-y, 1-z; (vii) 1+x, 3/2-y, z; (viii) 1+x, y, z; (ix) 1+x, 1+y, z; (x) 1-x, 1/2+y, 1-z; (xi) x, 1/2-y, z; (xii) 1-x, y-1/2, 1-z.

**Table S2** Atomic site parameters for **1** and **2**.

| BaCu <sub>2</sub> (PO <sub>4</sub> ) <sub>2</sub> (H <sub>2</sub> O) |              |               |               |               |
|----------------------------------------------------------------------|--------------|---------------|---------------|---------------|
| atoms                                                                | <i>x</i>     | <i>y</i>      | <i>z</i>      | <i>U</i>      |
| Ba1                                                                  | 0.50269 (3)  | 0.520739 (17) | 0.463829 (11) | 0.00913 (5)   |
| Cu1                                                                  | 0.51885 (9)  | 0.25142 (3)   | 0.26005 (2)   | 0.00782 (8)   |
| Cu2                                                                  | 0.10029 (7)  | 0.01181 (4)   | 0.27986 (3)   | 0.00689 (8)   |
| P1                                                                   | 0.01741 (18) | 0.30149 (7)   | 0.37728 (5)   | 0.00576 (15)  |
| P2                                                                   | 0.01363 (18) | 0.22221 (7)   | 0.13268 (5)   | 0.00561 (14)  |
| O1                                                                   | 0.2846 (4)   | 0.3458 (2)    | 0.33972 (16)  | 0.0103 (5)    |
| O2                                                                   | -0.0115 (5)  | 0.14526 (19)  | 0.37514 (13)  | 0.0095 (4)    |
| O3                                                                   | -0.0236 (5)  | 0.3611 (2)    | 0.47147 (14)  | 0.0131 (5)    |
| O4                                                                   | -0.1942 (4)  | 0.3658 (2)    | 0.31131 (7)   | 0.0081 (5)    |
| O5                                                                   | 0.2265 (4)   | 0.1541 (2)    | 0.19567 (6)   | 0.0063 (5)    |
| O6                                                                   | -0.2525 (4)  | 0.1767 (2)    | 0.16968 (17)  | 0.0101 (5)    |
| O7                                                                   | 0.0541 (4)   | 0.3789 (2)    | 0.13935 (14)  | 0.0089 (5)    |
| O8                                                                   | 0.0471 (4)   | 0.1755 (2)    | 0.03588 (15)  | 0.0114 (5)    |
| O9                                                                   | 0.4839 (4)   | 0.0370 (2)    | 0.35244 (16)  | 0.0163 (5)    |
| H9A                                                                  | 0.618 (7)    | -0.011 (4)    | 0.353 (2)     | 0.020 (fixed) |
| H9B                                                                  | 0.476 (7)    | 0.055 (4)     | 0.407 (3)     | 0.020 (fixed) |
| Ba <sub>2</sub> Cu(HPO <sub>4</sub> )(PO <sub>4</sub> )(OH)          |              |               |               |               |
| atoms                                                                | <i>x</i>     | <i>y</i>      | <i>z</i>      | <i>U</i>      |
| Ba1                                                                  | 0.21405 (5)  | 0.7500        | 0.09602 (5)   | 0.00650 (13)  |
| Ba2                                                                  | 0.78511 (5)  | 0.7500        | 0.26916 (5)   | 0.00907 (13)  |
| Cu1                                                                  | 0.5000       | 0.5000        | 0.5000        | 0.00736 (19)  |
| P1                                                                   | 0.4899 (2)   | 0.2500        | 0.1825 (2)    | 0.0052 (3)    |
| P2                                                                   | 0.0637 (2)   | 0.2500        | 0.3034 (2)    | 0.0050 (3)    |
| O1                                                                   | 0.5049 (5)   | 0.4696 (6)    | 0.2819 (4)    | 0.0084 (7)    |
| O2                                                                   | 0.3166 (7)   | 0.2500        | 0.0384 (6)    | 0.0165 (12)   |
| O3                                                                   | 0.6489 (7)   | 0.2500        | 0.1362 (7)    | 0.0146 (11)   |
| O4                                                                   | 0.0198 (4)   | 0.4641 (6)    | 0.1996 (4)    | 0.0108 (7)    |
| O5                                                                   | 0.2414 (7)   | 0.2500        | 0.4375 (6)    | 0.0100 (10)   |
| O6                                                                   | -0.0730 (7)  | 0.2500        | 0.3932 (7)    | 0.0137 (11)   |
| O7                                                                   | 0.3424 (6)   | 0.7500        | 0.4202 (6)    | 0.0083 (10)   |
| H6                                                                   | -0.1760      | 0.2500        | 0.3651        | 0.020 (fixed) |
| H7                                                                   | 0.2460       | 0.7500        | 0.4370        | 0.020 (fixed) |

**Table S3** The geometries of hydrogen bonds for **1** and **2**.

| compound | D-H $\cdots$ A     | d <sub>D-H</sub> (Å) | d <sub>H<math>\cdots</math>A</sub> (Å) | d <sub>D<math>\cdots</math>A</sub> (Å) | $\angle$ D-H $\cdots$ A (°) |
|----------|--------------------|----------------------|----------------------------------------|----------------------------------------|-----------------------------|
| <b>1</b> | O9-H9A $\cdots$ O3 | 0.81                 | 1.95                                   | 2.75                                   | 167.25                      |
|          | O9-H9A $\cdots$ O7 | 0.84                 | 2.01                                   | 2.84                                   | 167.93                      |
| <b>2</b> | O7-H7 $\cdots$ O6  | 0.87                 | 2.48                                   | 3.29                                   | 154.23                      |
|          | O6-H6 $\cdots$ O3  | 0.80                 | 2.03                                   | 2.58                                   | 126.22                      |



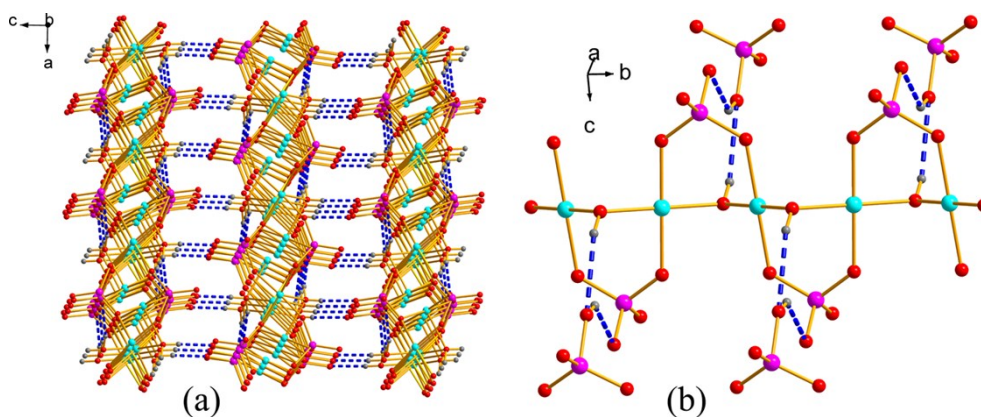

**Fig. S3** The hydrogen bonds (blue dashed lines) in (a) **1** and (b) **2**. Cu, Turquoise; P, Pink; O, red; H, gray. The Ba atoms in both compounds are omitted for clarity.

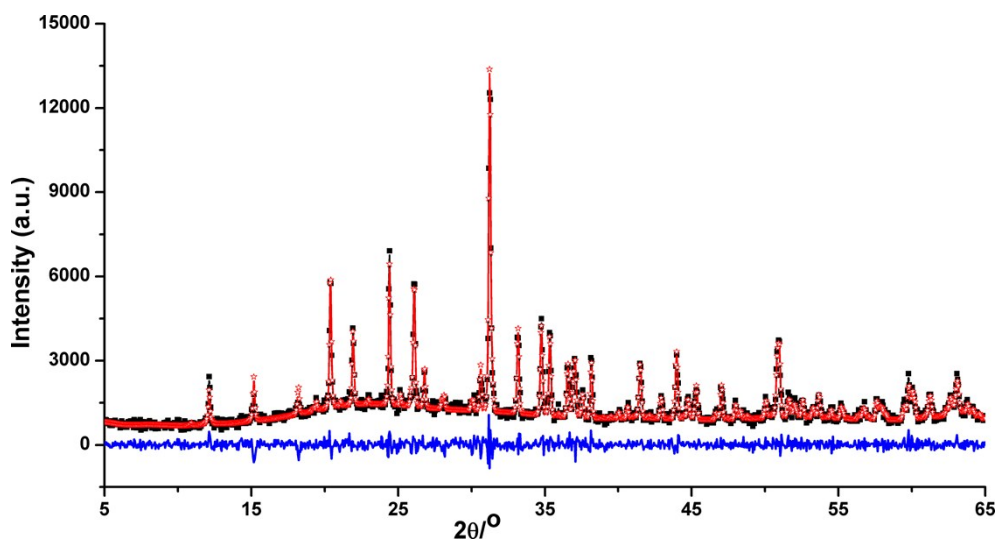

**Fig. S4** The experimental XRD patterns for compound **1** fitted by Rietveld method. The fitting crystal constants are  $a = 5.158 \text{ \AA}$ ,  $b = 9.736 \text{ \AA}$ ,  $c = 14.569 \text{ \AA}$ ,  $\alpha = \beta = \gamma = 90^\circ$  with space group  $P2_12_12_1$ . Black, sample; red, calculated; blue, difference.

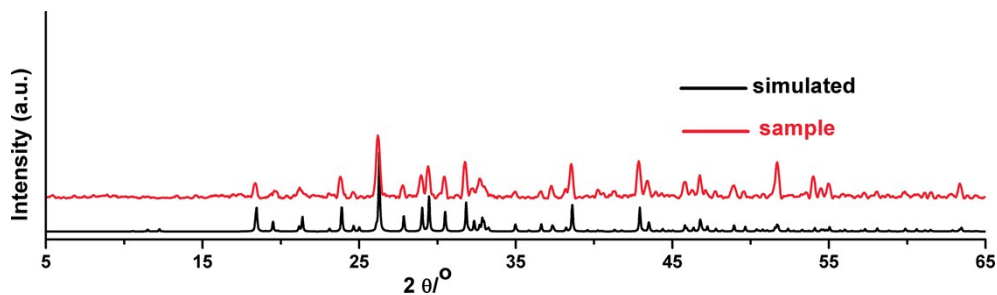

**Fig. S5** Powder X-ray patterns of compound **2**.

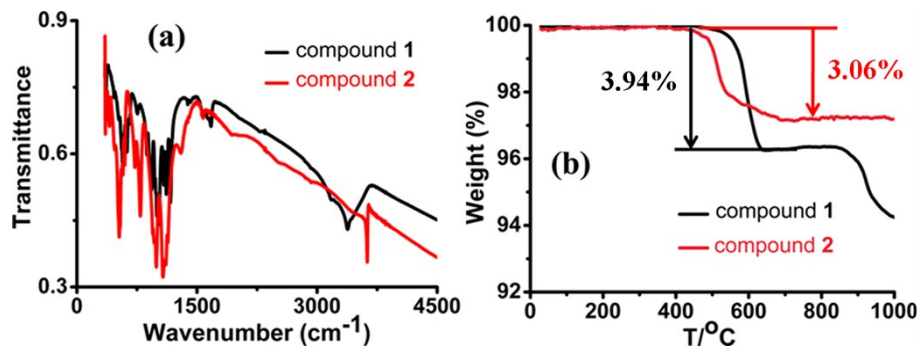

Fig. S6 Infrared spectrums (a) and TG curves (b) for **1** and **2**.

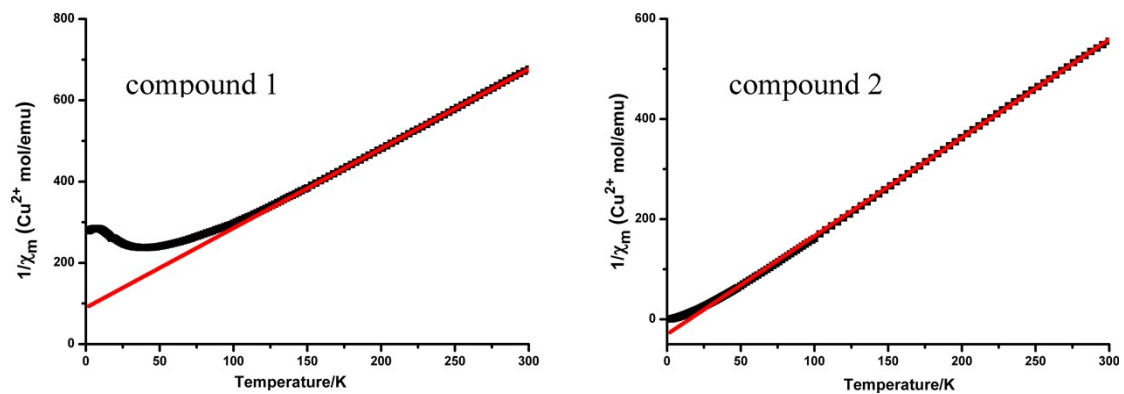

Fig. S7 The  $\chi_m^{-1}$  vs  $T$  curves for compounds **1** and **2**.

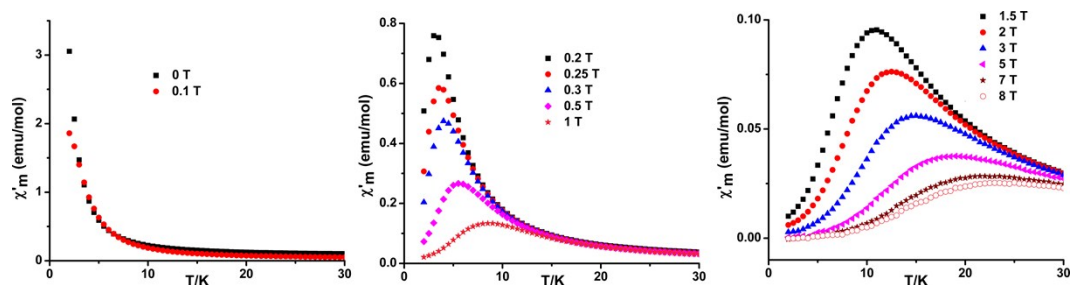

Fig. S8 The  $\chi'_m$  vs  $T$  curves for compound **2** between 2 and 30 K at different static magnetic fields with  $H_{ac} = 3$  Oe and  $f = 1000$  Hz.

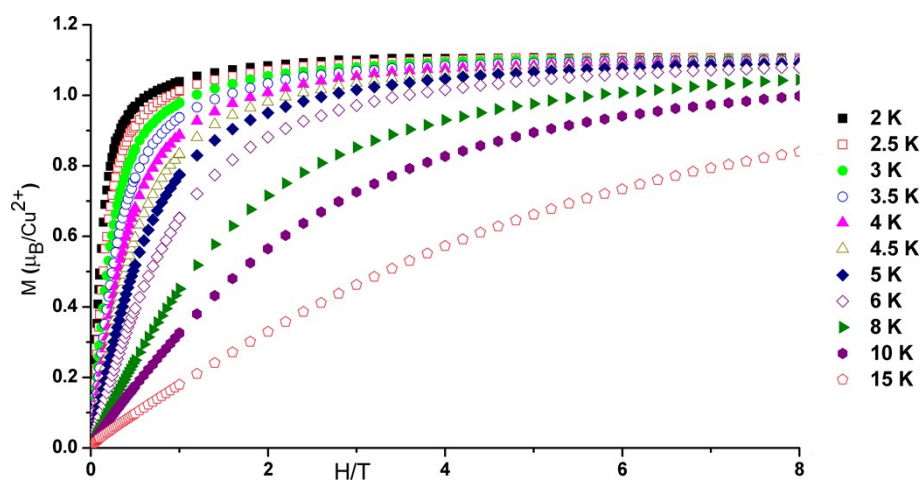

**Fig. S9** Isothermal magnetization curves measured at 2, 2.5, 3, 3.5, 4, 4.5, 5, 6, 8, 10 and 15 K for compound 2.

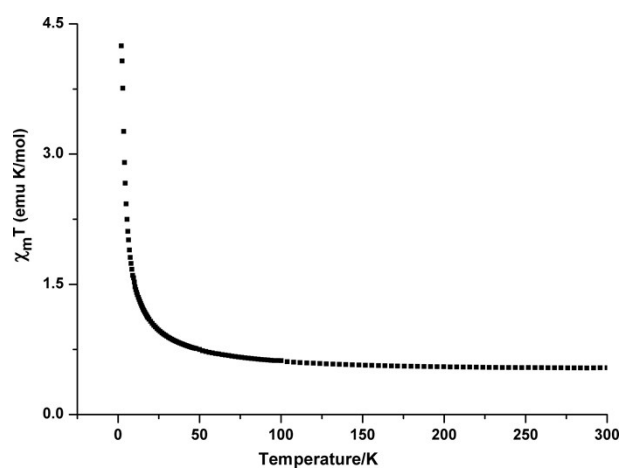

**Fig. S10** The  $\chi_m T$  vs  $T$  curve for compound 2.

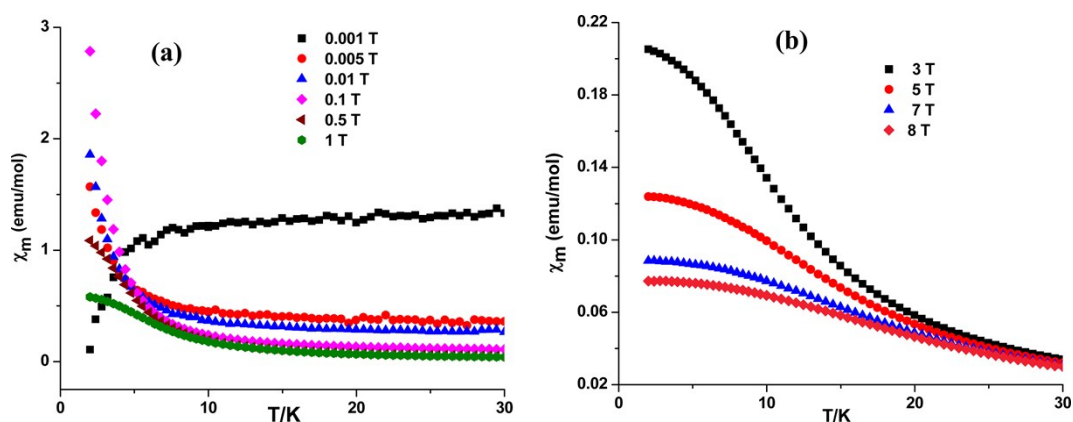

**Fig. S11** Magnetic susceptibilities at external fields from 0.001 T to 8 T between 2 and 30 K for compound 2.
